# Supplementary material for: How Can Ten Fingers Shape a Pot? Evidence for Equivalent Function in Culturally Distinct Motor Skills
Source: PubMed Central journal article supplement (PMC3842241; doi:10.1371/journal.pone.0081614), 2013-11-27

## Hand Position Repertoire

In this study we analyzed the hand positions of the potter all along the shaping process. A hand position is the way the potter places his fingers on the lump of clay for each gesture. These hand positions are the only observable element of skill which could guide the novice during the apprenticeship. In fact, expert potters often encourage the novice to observe and copy their hand positions. Four main operations can be distinguished in the shaping process: the centering, the hollowing, the thinning and the final shaping. Generally, a specific hand position is used for a particular operation. The same position can be used by several potters and also for the same operation.

We have systematically observed (on video) the hand positions used by 13 expert potters (seven French and six Indian Multani) producing 10 sphere shaped vessels (five small and five large) in their traditional way (i.e. using their habitual wheel and their regular clay raw material). We have assigned a code to each position identified (N=62 distinct hand positions). The following table summarizes for each hand position: vessel size (small vs. large pots), artisans (French vs. Multani), and idiosyncratic position or no. The red color indicates the idiosyncratic hand positions (i.e. hand position used by a single potter in one of the two groups).

| hand position           | small sphere | large sphere | French | Multani | hand position | small sphere | large sphere | French    | Multani   |
|-------------------------|--------------|--------------|--------|---------|---------------|--------------|--------------|-----------|-----------|
| 1                       | x            | x            | x      | x       | 32            | x            | x            | x         |           |
| 2                       | x            | x            | x      | x       | 33            | x            | x            | x         |           |
| 3                       | x            | x            |        | x       | 34            | x            | x            | x         |           |
| 4                       | x            | x            |        | x       | 35            | x            | x            | x         |           |
| 5                       | x            | x            |        | x       | 36            |              | x            | x         |           |
| 6                       | x            | x            | x      |         | 37            | x            | x            | x         |           |
| 7                       | x            | x            | x      | x       | 38            | x            | x            | x         |           |
| 8                       | x            | x            | x      | x       | 39            | x            | x            | x         |           |
| 9                       | x            | x            |        | x       | 40            | x            | x            | x         |           |
| 10                      | x            | x            | x      | x       | 41            | x            |              | x         |           |
| 11                      | x            | x            | x      | x       | 42            | x            | x            | x         |           |
| 12                      | x            | x            | x      |         | 43            | x            | x            | x         |           |
| 13                      | x            | x            | x      | x       | 44            | x            | x            | x         |           |
| 14                      | x            | x            |        | x       | 45            | x            | x            | x         |           |
| 15                      |              | x            | x      |         | 46            | x            | x            | x         |           |
| 16                      | x            | x            | x      | x       | 47            |              | x            | x         |           |
| 17                      | x            | x            | x      | x       | 48            | x            | x            | x         |           |
| 18                      | x            | x            | x      | x       | 49            | x            | x            | x         |           |
| 19                      | x            |              |        | x       | 50            | x            |              | x         |           |
| 20                      | x            | x            | x      | x       | 51            | x            | x            | x         |           |
| 21                      |              | x            |        | x       | 52            |              | x            | x         |           |
| 22                      | x            | x            | x      | x       | 53            |              | x            | x         |           |
| 23                      | x            | x            | x      | x       | 54            | x            | x            | x         |           |
| 24                      | x            | x            |        | x       | 55            |              | x            | x         |           |
| 25                      | x            | x            | x      | x       | 56            | x            | x            | x         |           |
| 26                      | x            | x            | x      | x       | 57            | x            | x            | x         |           |
| 27                      | x            | x            | x      | x       | 58            |              | x            | x         |           |
| 28                      | x            | x            |        | x       | 59            |              | x            | x         |           |
| 29                      | x            | x            | x      | x       | 60            |              | x            | x         |           |
| 30                      | x            | x            |        | x       | 61            | x            |              | x         |           |
| 31                      |              | x            |        | x       | 62            |              | x            | x         |           |
|                         |              |              |        |         | <b>total</b>  | <b>50</b>    | <b>58</b>    | <b>51</b> | <b>28</b> |
| Idiosyncratic Positions |              |              |        |         | <b>total</b>  |              |              | <b>16</b> | <b>7</b>  |

*Hand position 1*

| hand position | small sphere | large sphere | French | Multani |
|---------------|--------------|--------------|--------|---------|
| 1             | x            | x            | x      | x       |

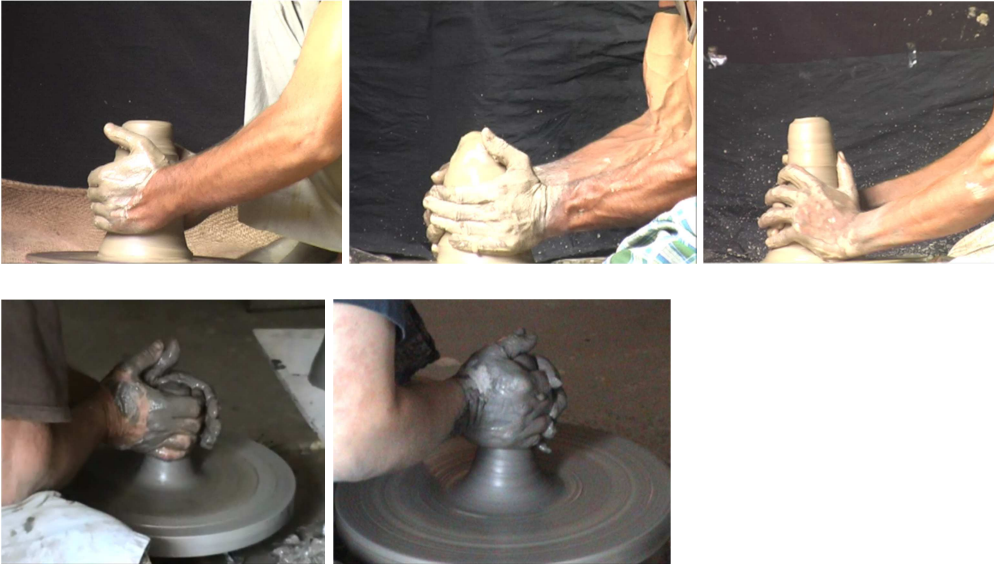*Hand position 2*

| hand position | small sphere | large sphere | French | Multani |
|---------------|--------------|--------------|--------|---------|
| 2             | x            | x            | x      | x       |

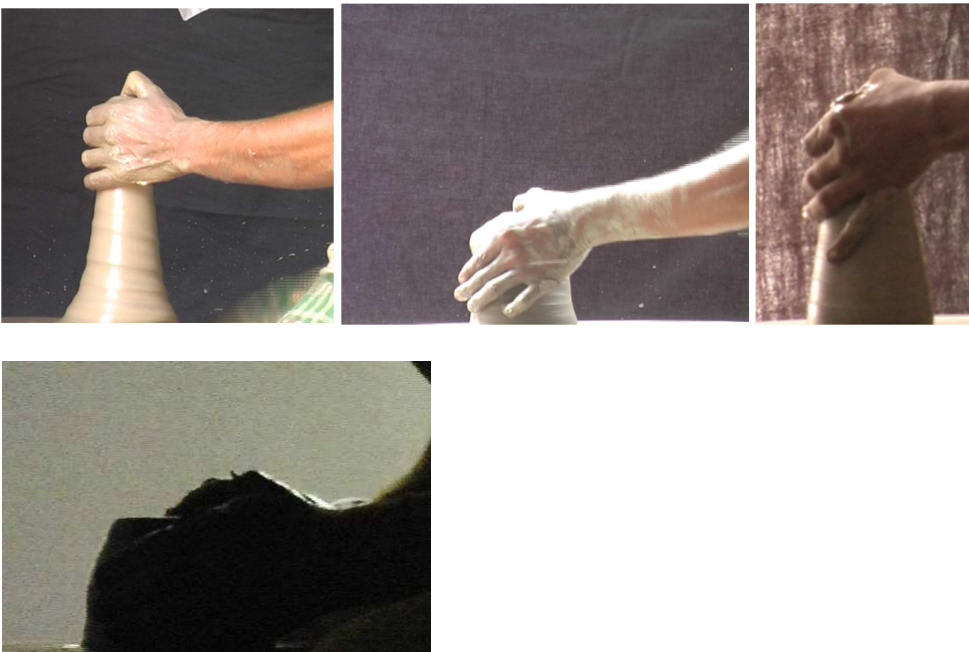

*Hand position 3*

| hand position | small sphere | large sphere | French | Multani |
|---------------|--------------|--------------|--------|---------|
| 3             | x            | x            |        | x       |

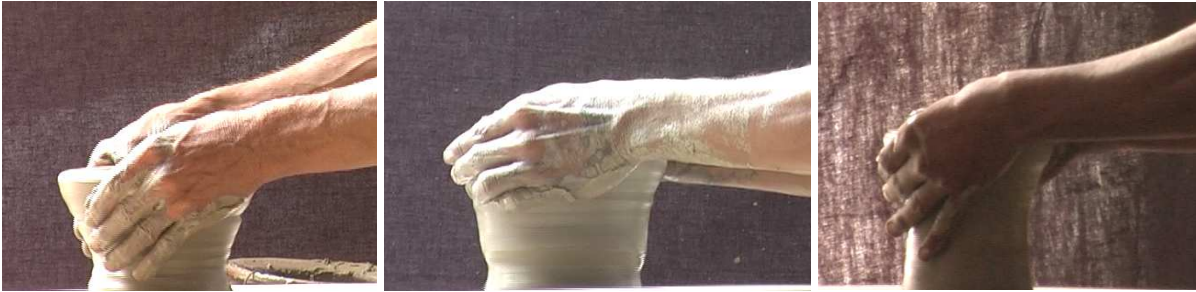*Hand position 4*

| hand position | small sphere | large sphere | French | Multani |
|---------------|--------------|--------------|--------|---------|
| 4             | x            | x            |        | x       |

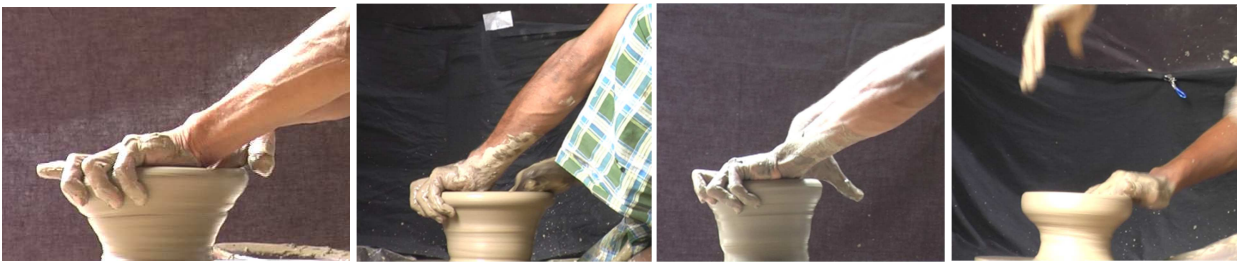*Hand position 5*

| hand position | small sphere | large sphere | French | Multani |
|---------------|--------------|--------------|--------|---------|
| 5             | x            | x            |        | x       |

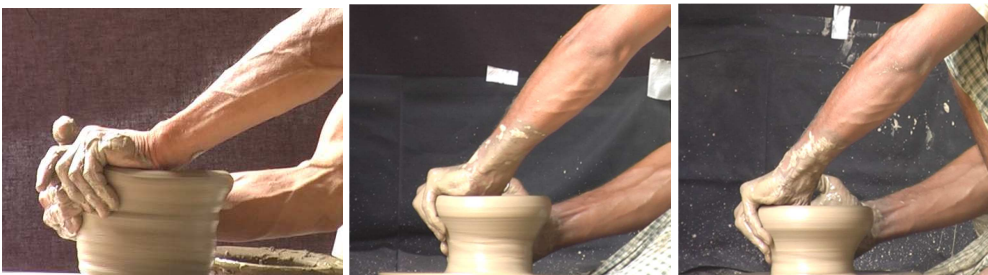

*Hand position 6*

| hand position | small sphere | large sphere | French | Multani |
|---------------|--------------|--------------|--------|---------|
| 6             | x            | x            | x      |         |

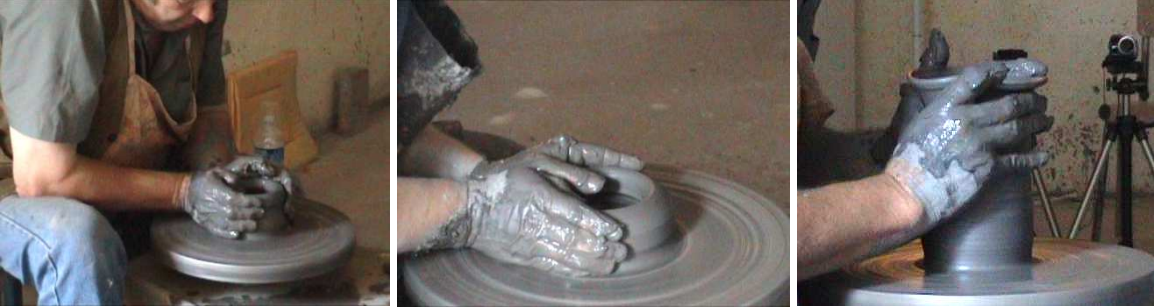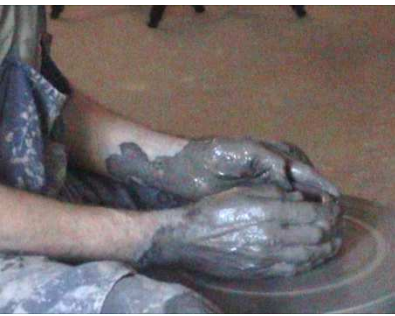*Hand position 7*

| hand position | small sphere | large sphere | French | Multani |
|---------------|--------------|--------------|--------|---------|
| 7             | x            | x            | x      | x       |

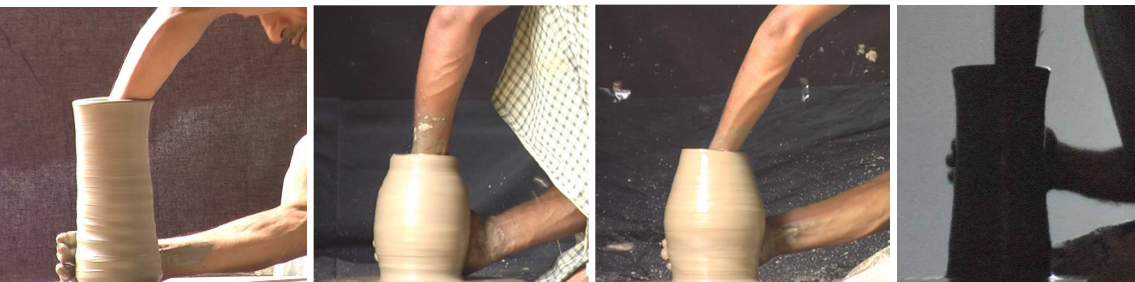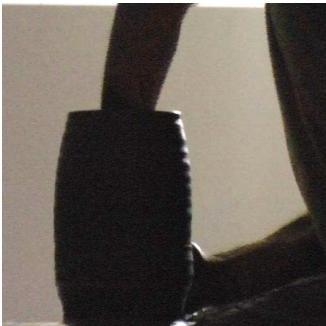

*Hand position 8*

| hand position | small sphere | large sphere | French | Multani |
|---------------|--------------|--------------|--------|---------|
| 8             | x            | x            | x      | x       |

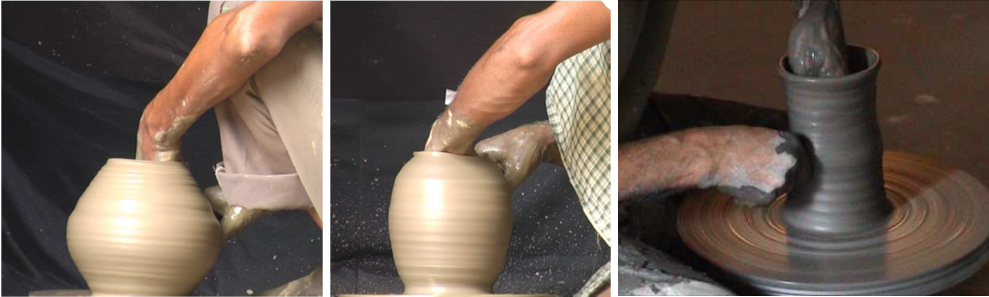*Hand position 9*

| hand position | small sphere | large sphere | French | Multani |
|---------------|--------------|--------------|--------|---------|
| 9             | x            | x            |        | x       |

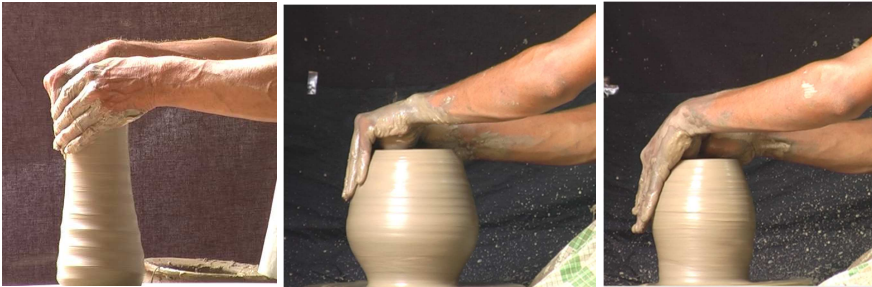*Hand position 10*

| hand position | small sphere | large sphere | French | Multani |
|---------------|--------------|--------------|--------|---------|
| 10            | x            | x            | x      | x       |

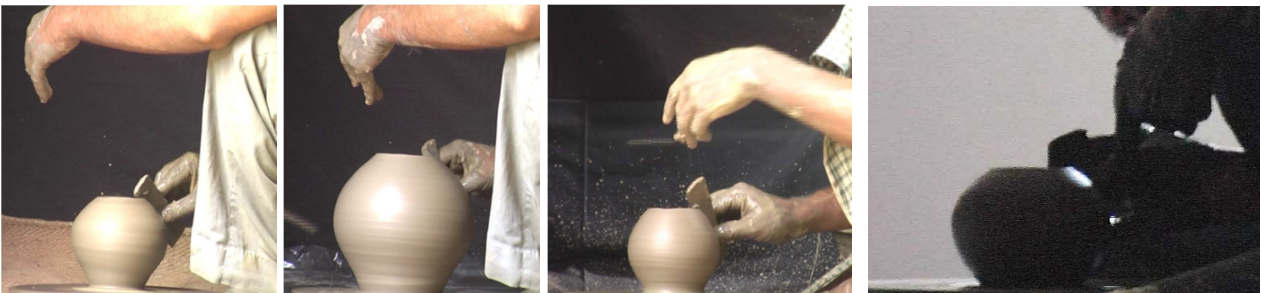

*Hand position 11*

| hand position | small sphere | large sphere | French | Multani |
|---------------|--------------|--------------|--------|---------|
| 11            | x            | x            | x      | x       |

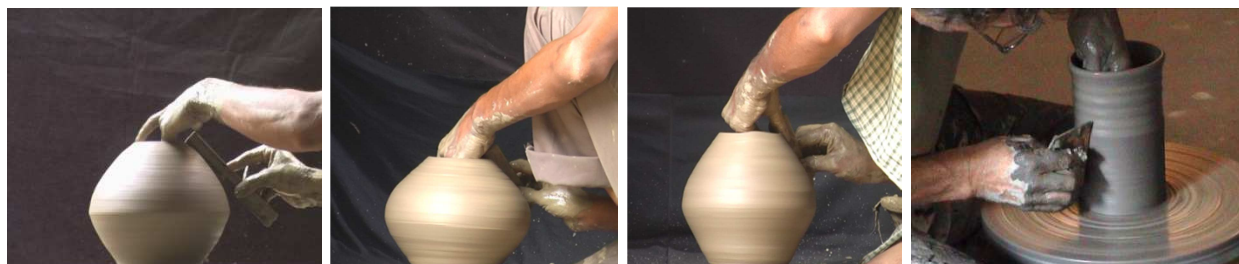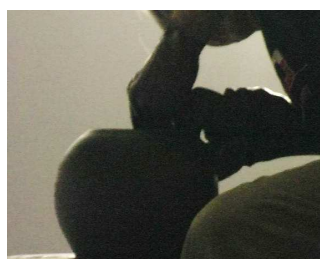*Hand position 12*

| hand position | small sphere | large sphere | French | Multani |
|---------------|--------------|--------------|--------|---------|
| 12            | x            | x            | x      |         |

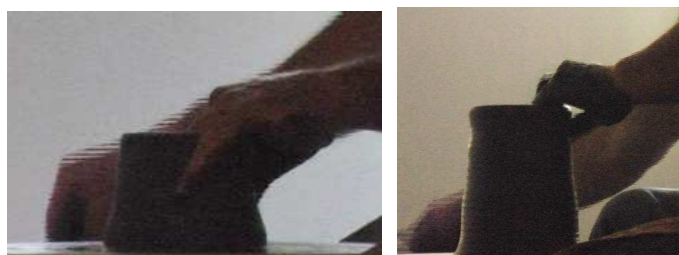

***Hand position 13***

| hand position | small sphere | large sphere | French | Multani |
|---------------|--------------|--------------|--------|---------|
| 13            | x            | x            | x      | x       |

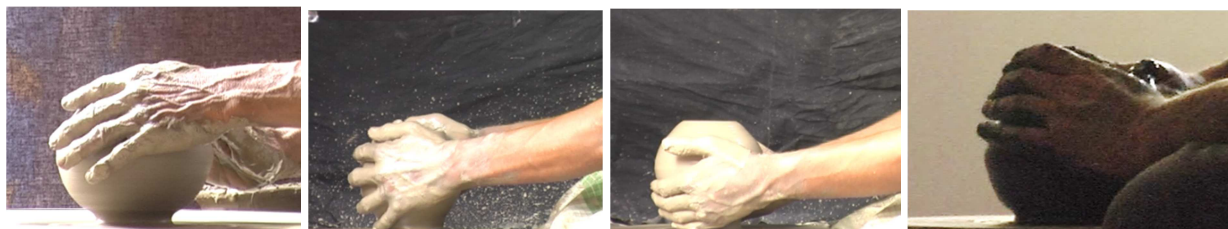***Hand position 14***

| hand position | small sphere | large sphere | French | Multani |
|---------------|--------------|--------------|--------|---------|
| 14            | x            | x            |        | x       |

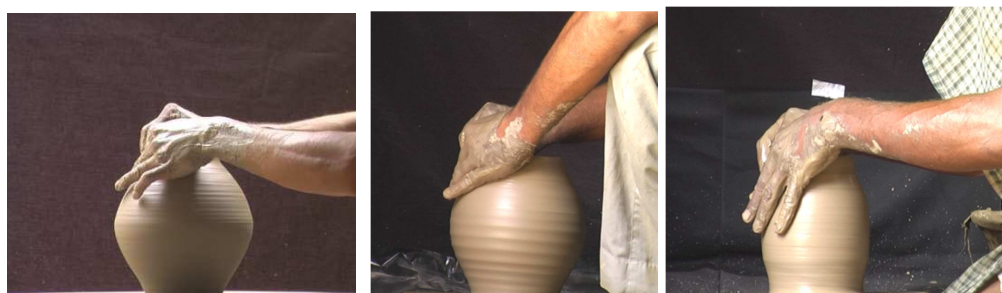***Hand position 15***

| hand position | small sphere | large sphere | French | Multani |
|---------------|--------------|--------------|--------|---------|
| 15            |              | x            | x      |         |

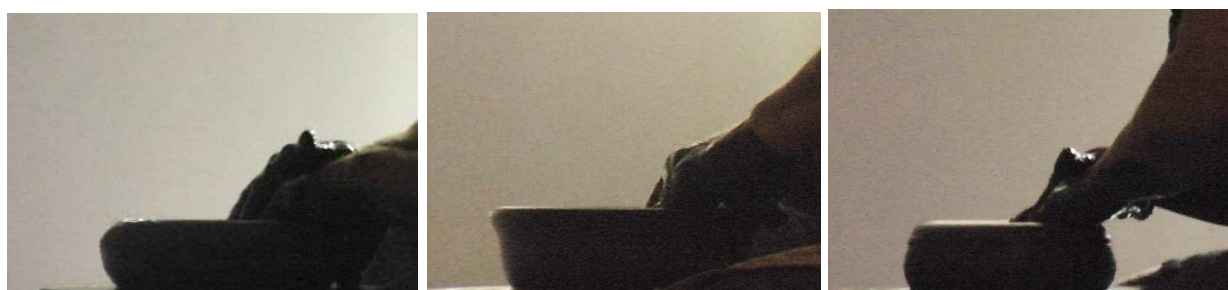

*Hand position 16*

| hand position | small sphere | large sphere | French | Multani |
|---------------|--------------|--------------|--------|---------|
| 16            | x            | x            | x      | x       |

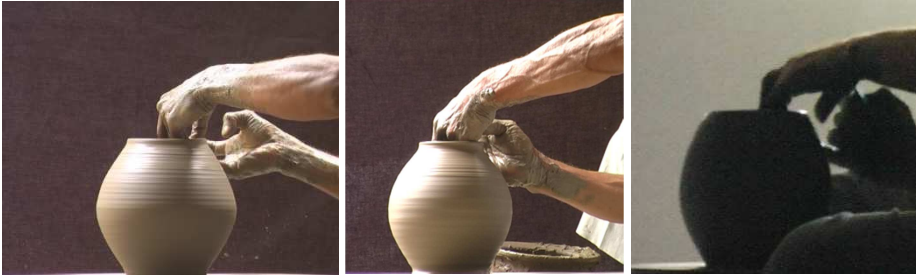*Hand position 17*

| hand position | small sphere | large sphere | French | Multani |
|---------------|--------------|--------------|--------|---------|
| 17            | x            | x            | x      | x       |

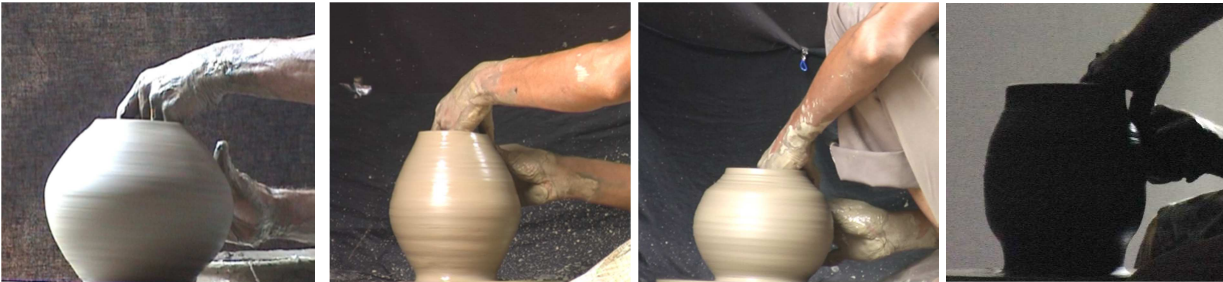*Hand position 18*

| hand position | small sphere | large sphere | French | Multani |
|---------------|--------------|--------------|--------|---------|
| 18            | x            | x            | x      | x       |

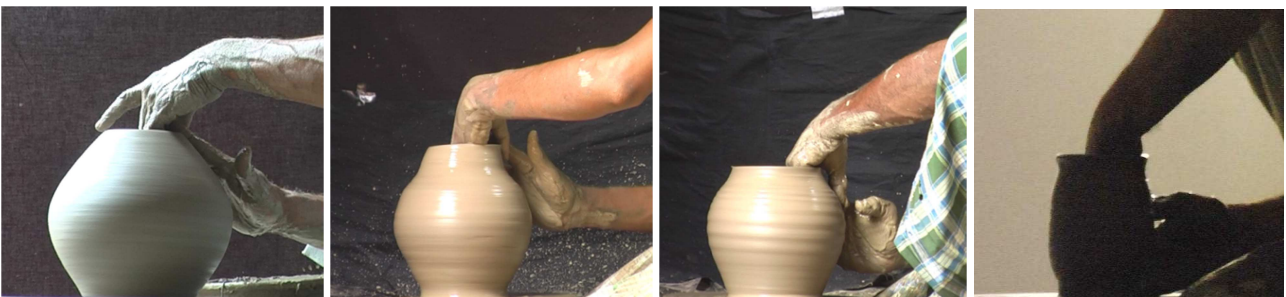



*Hand position 19*

| hand position | small sphere | large sphere | French | Multani |
|---------------|--------------|--------------|--------|---------|
| 19            | x            |              |        | x       |

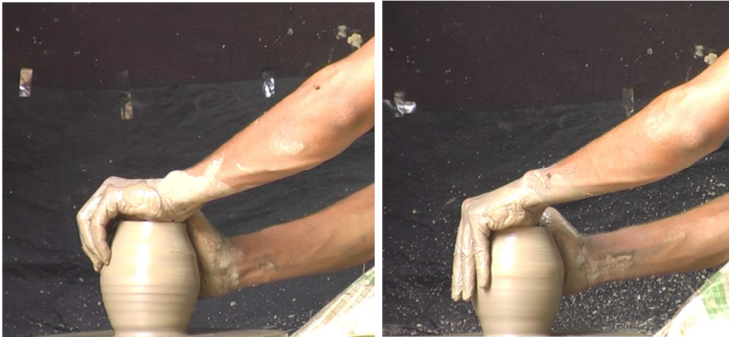*Hand position 20*

| hand position | small sphere | large sphere | French | Multani |
|---------------|--------------|--------------|--------|---------|
| 20            | x            | x            | x      | x       |

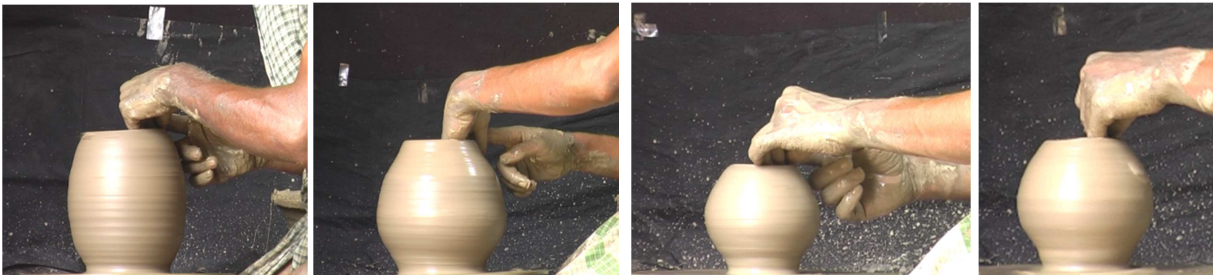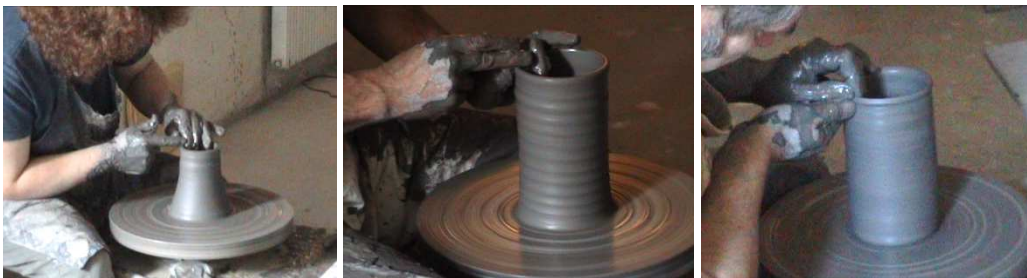

*Hand position 21*

| hand position | small sphere | large sphere | French | Multani |
|---------------|--------------|--------------|--------|---------|
| 21            |              | x            |        | x       |

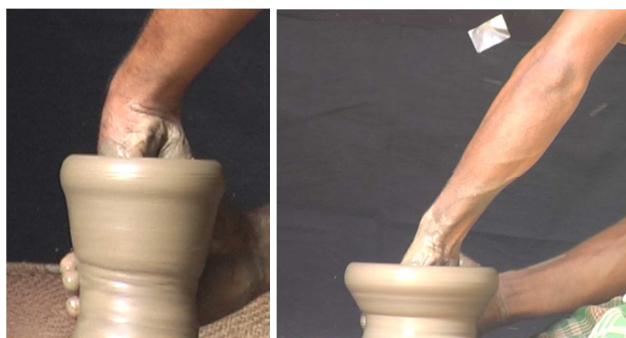*Hand position 22*

| hand position | small sphere | large sphere | French | Multani |
|---------------|--------------|--------------|--------|---------|
| 22            | x            | x            | x      | x       |

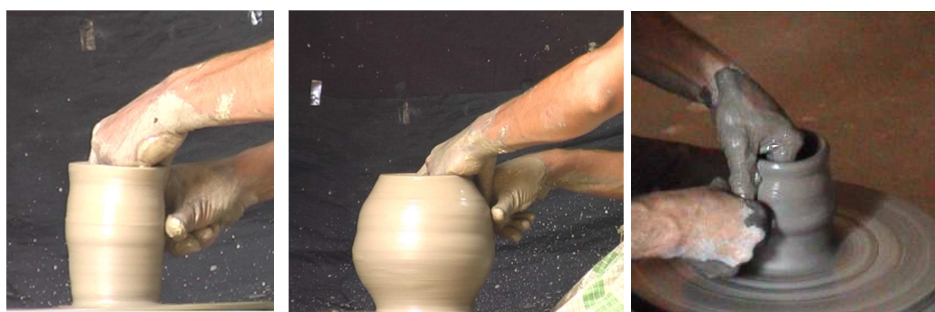*Hand position 23*

| hand position | small sphere | large sphere | French | Multani |
|---------------|--------------|--------------|--------|---------|
| 23            | x            | x            | x      | x       |

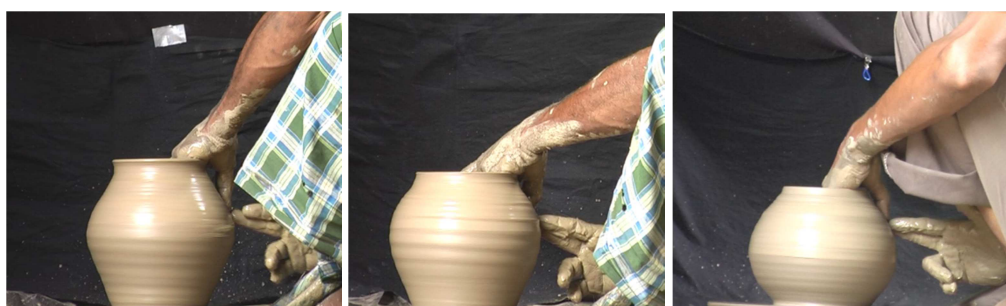

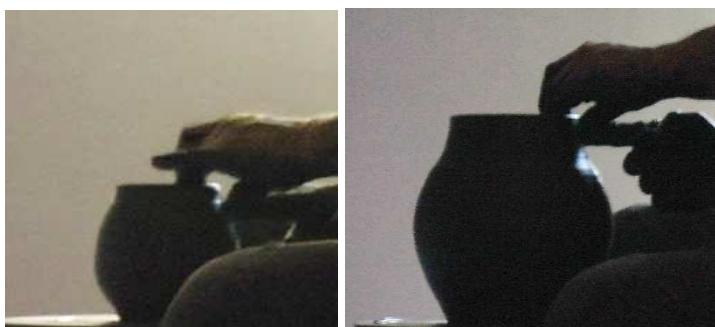

*Hand position 24*

| hand position | small sphere | large sphere | French | Multani |
|---------------|--------------|--------------|--------|---------|
| 24            | x            | x            |        | x       |

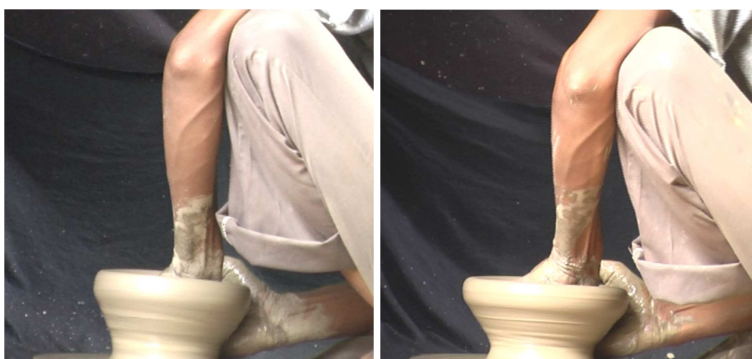

*Hand position 25*

| hand position | small sphere | large sphere | French | Multani |
|---------------|--------------|--------------|--------|---------|
| 25            | x            | x            | x      | x       |

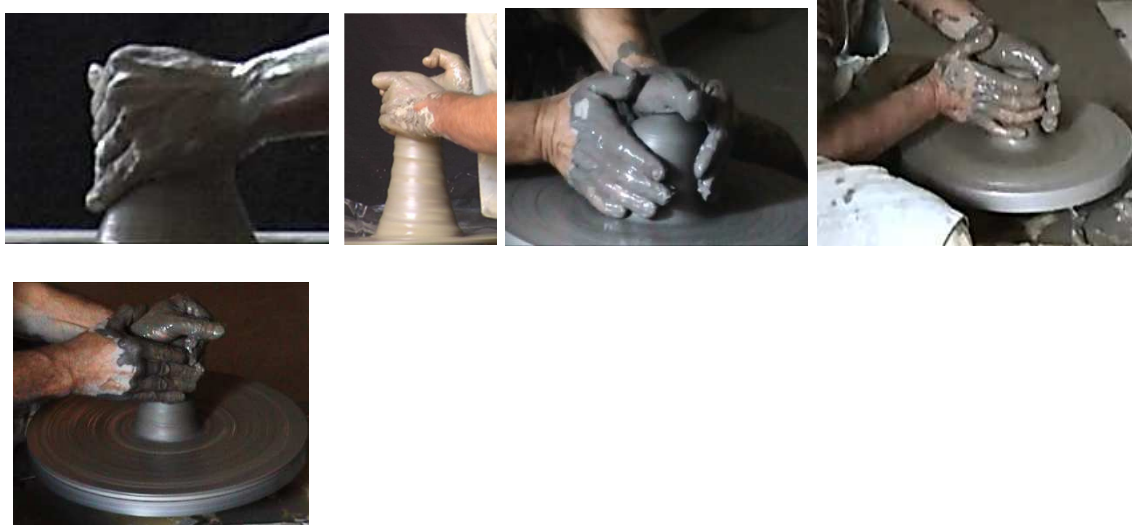

*Hand position 26*

| hand position | small sphere | large sphere | French | Multani |
|---------------|--------------|--------------|--------|---------|
| 26            | x            | x            | x      | x       |

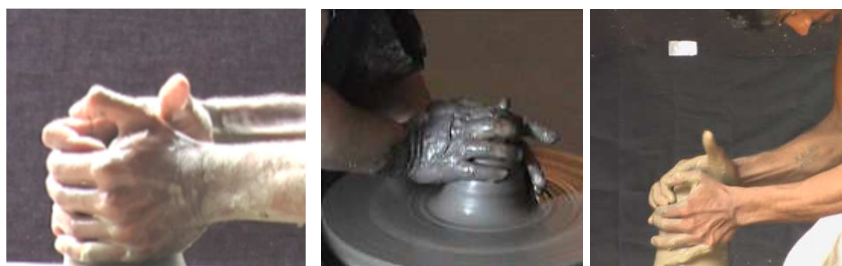*Hand position 27*

| hand position | small sphere | large sphere | French | Multani |
|---------------|--------------|--------------|--------|---------|
| 27            | x            | x            | x      | x       |

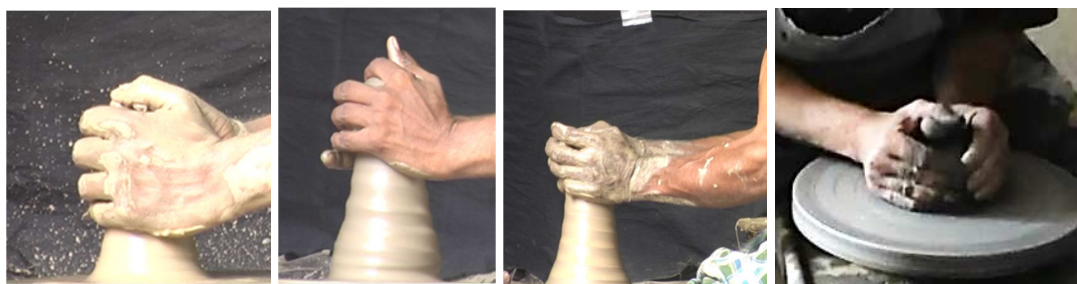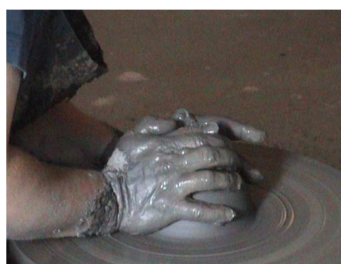

*Hand position 28*

| hand position | small sphere | large sphere | French | Multani |
|---------------|--------------|--------------|--------|---------|
| 28            | x            | x            |        | x       |

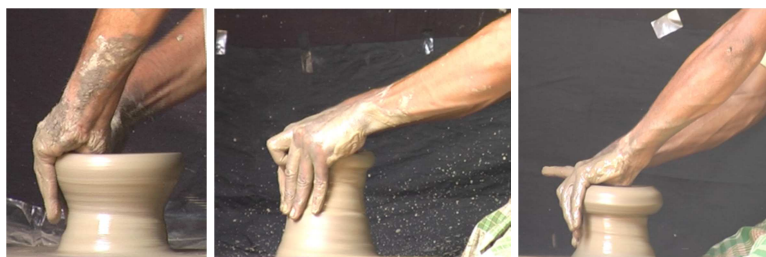*Hand position 29*

| hand position | small sphere | large sphere | French | Multani |
|---------------|--------------|--------------|--------|---------|
| 29            | x            | x            | x      | x       |

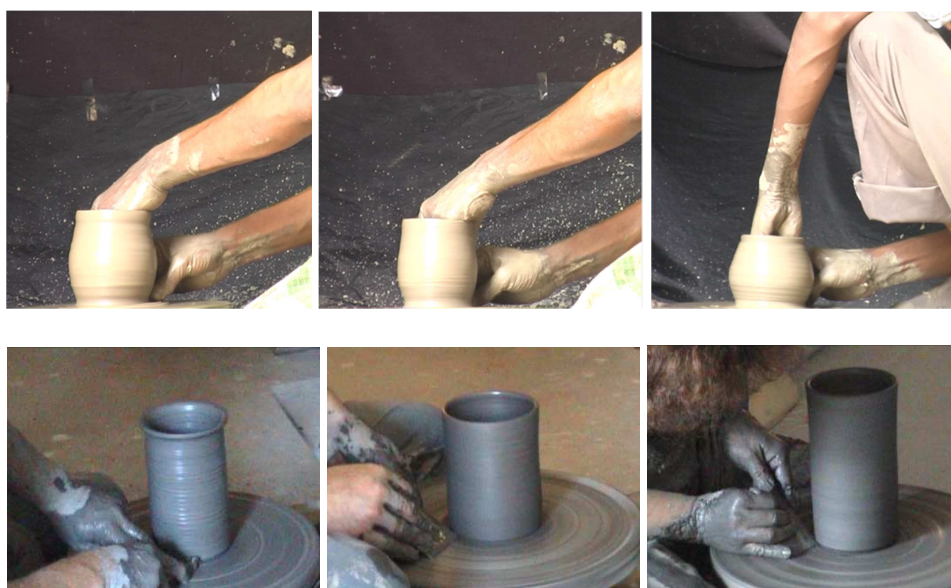

*Hand position 30*

| hand position | small sphere | large sphere | French | Multani |
|---------------|--------------|--------------|--------|---------|
| 30            | x            | x            |        | x       |

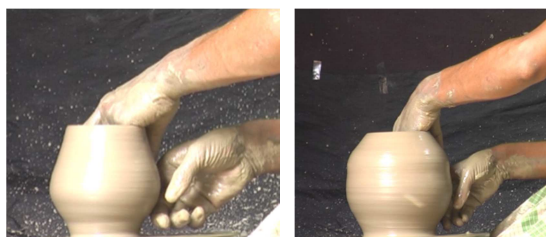*Hand position 31*

| hand position | small sphere | large sphere | French | Multani |
|---------------|--------------|--------------|--------|---------|
| 31            |              | x            |        | x       |

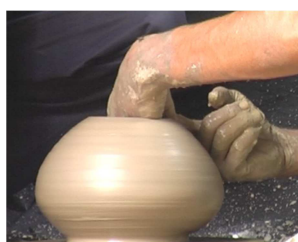*Hand position 32*

| hand position | small sphere | large sphere | French | Multani |
|---------------|--------------|--------------|--------|---------|
| 32            | x            | x            | x      |         |

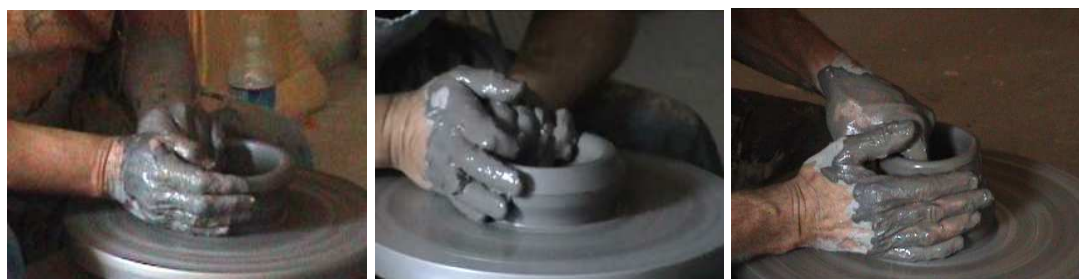

*Hand position 33*

| hand position | small sphere | large sphere | French | Multani |
|---------------|--------------|--------------|--------|---------|
| 33            | x            | x            | x      |         |

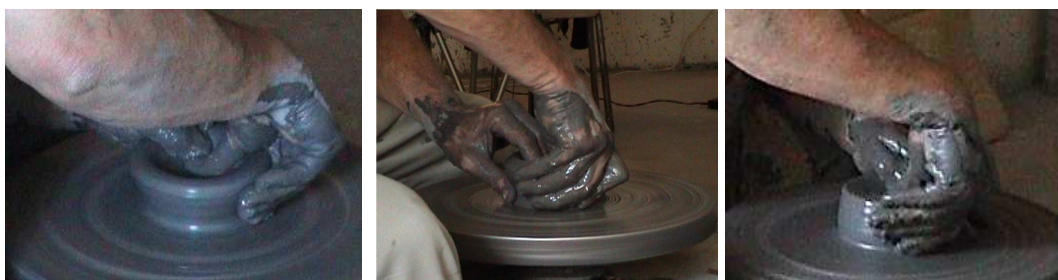*Hand position 34*

| hand position | small sphere | large sphere | French | Multani |
|---------------|--------------|--------------|--------|---------|
| 34            | x            | x            | x      |         |

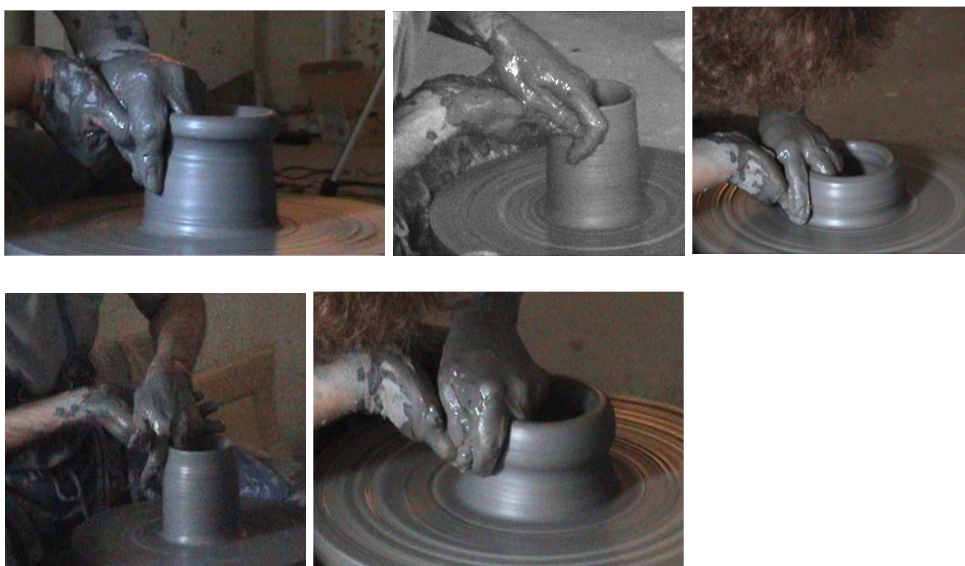

*Hand position 35*

| hand position | small sphere | large sphere | French | Multani |
|---------------|--------------|--------------|--------|---------|
| 35            | x            | x            | x      |         |

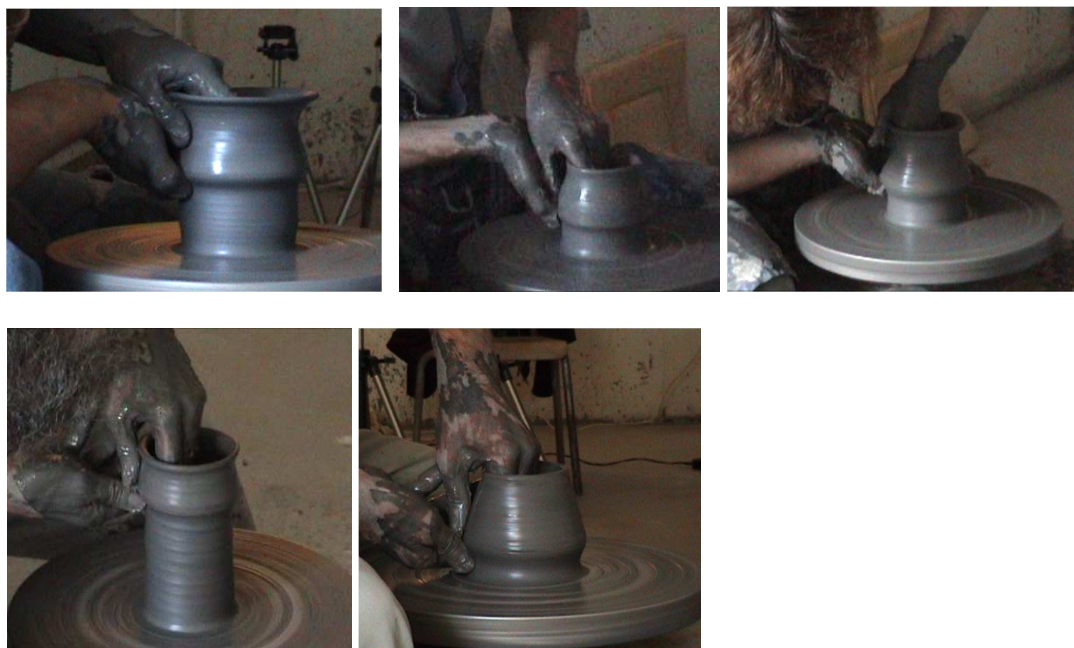*Hand position 36*

| hand position | small sphere | large sphere | French | Multani |
|---------------|--------------|--------------|--------|---------|
| 36            |              | x            | x      |         |

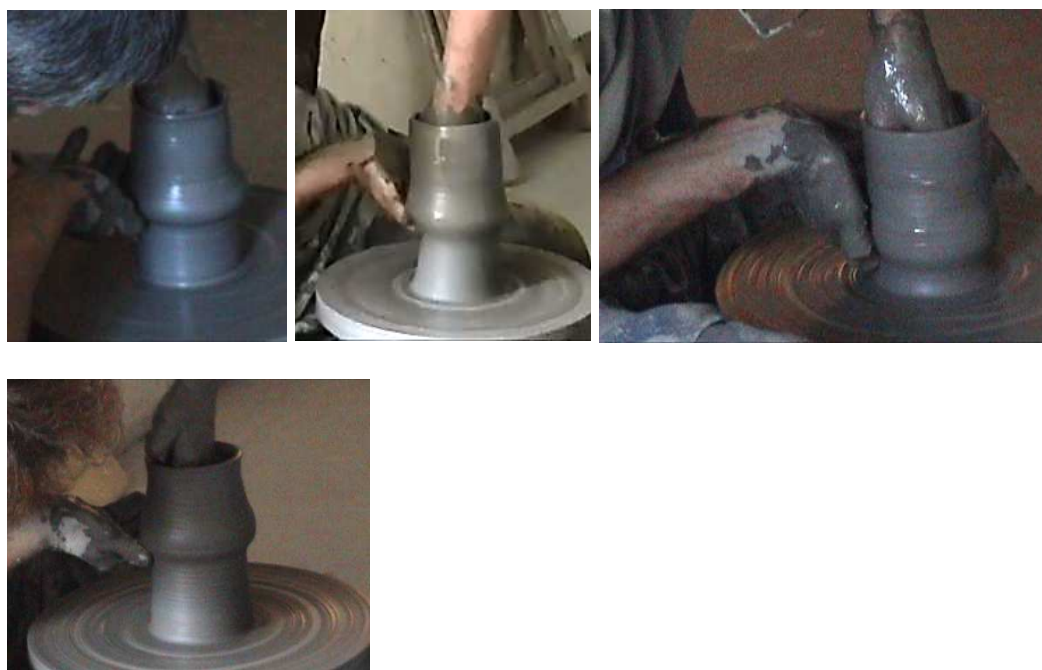



*Hand position 37*

| hand position | small sphere | large sphere | French | Multani |
|---------------|--------------|--------------|--------|---------|
| 37            | x            | x            | x      |         |

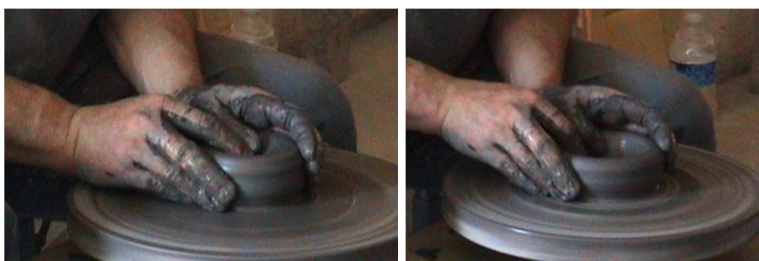*Hand position 38*

| hand position | small sphere | large sphere | French | Multani |
|---------------|--------------|--------------|--------|---------|
| 38            | x            | x            | x      |         |

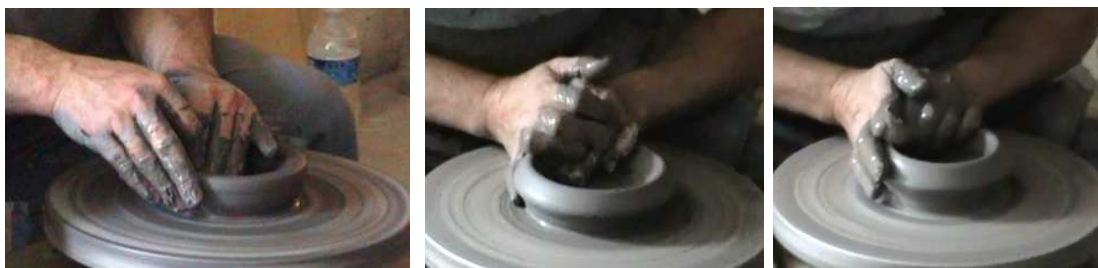*Hand position 39*

| hand position | small sphere | large sphere | French | Multani |
|---------------|--------------|--------------|--------|---------|
| 39            | x            | x            | x      |         |

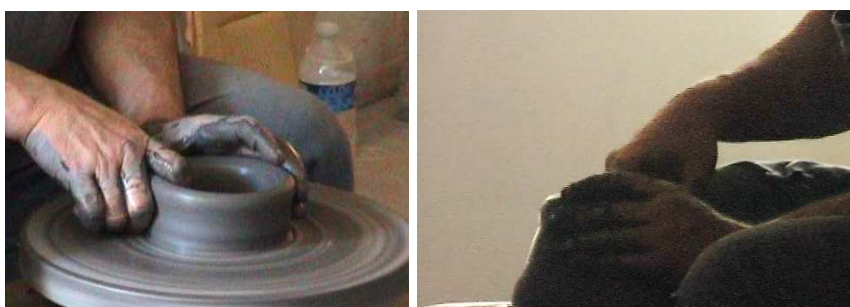

***Hand position 40***

| hand position | small sphere | large sphere | French | Multani |
|---------------|--------------|--------------|--------|---------|
| 40            | x            | x            | x      |         |

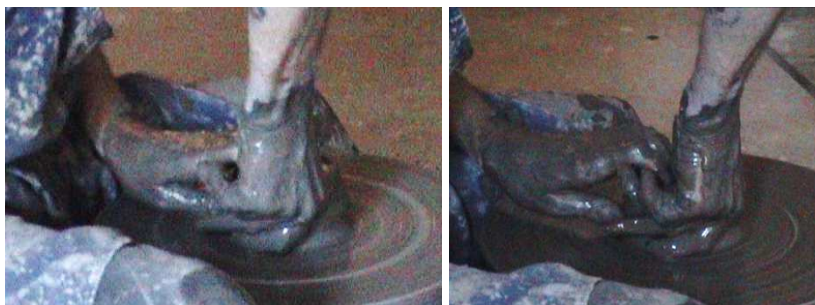***Hand position 41***

| hand position | small sphere | large sphere | French | Multani |
|---------------|--------------|--------------|--------|---------|
| 41            | x            |              | x      |         |

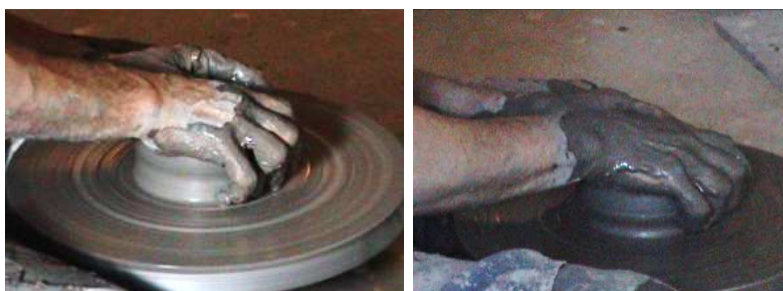***Hand position 42***

| hand position | small sphere | large sphere | French | Multani |
|---------------|--------------|--------------|--------|---------|
| 42            | x            | x            | x      |         |

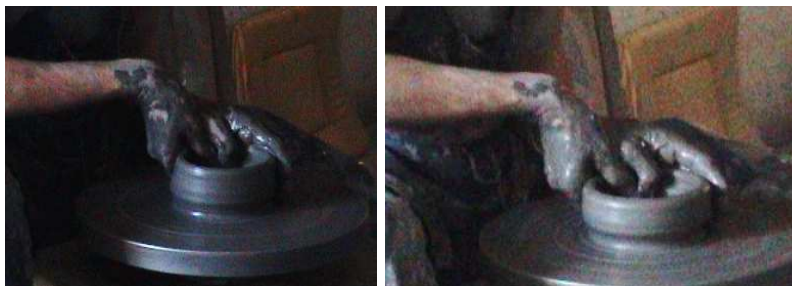

*Hand position 43*

| hand position | small sphere | large sphere | French | Multani |
|---------------|--------------|--------------|--------|---------|
| 43            | x            | x            | x      |         |

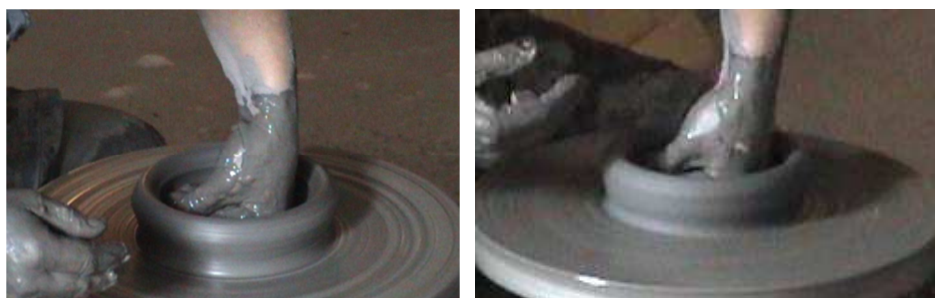*Hand position 44*

| hand position | small sphere | large sphere | French | Multani |
|---------------|--------------|--------------|--------|---------|
| 44            | x            | x            | x      |         |

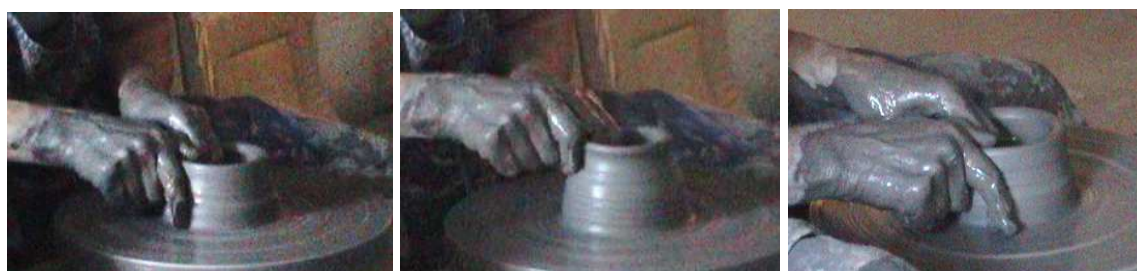*Hand position 45*

| hand position | small sphere | large sphere | French | Multani |
|---------------|--------------|--------------|--------|---------|
| 45            | x            | x            | x      |         |

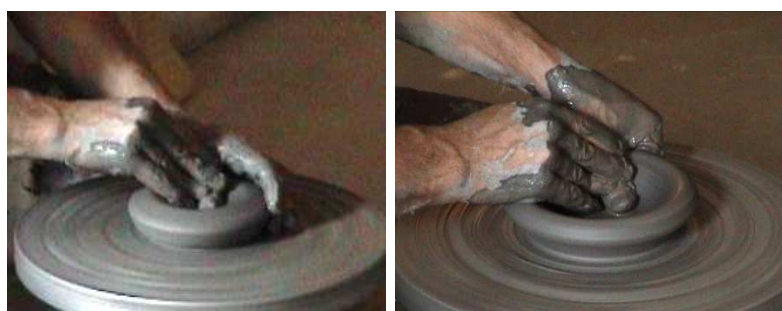

*Hand position 46*

| hand position | small sphere | large sphere | French | Multani |
|---------------|--------------|--------------|--------|---------|
| 46            | x            | x            | x      |         |

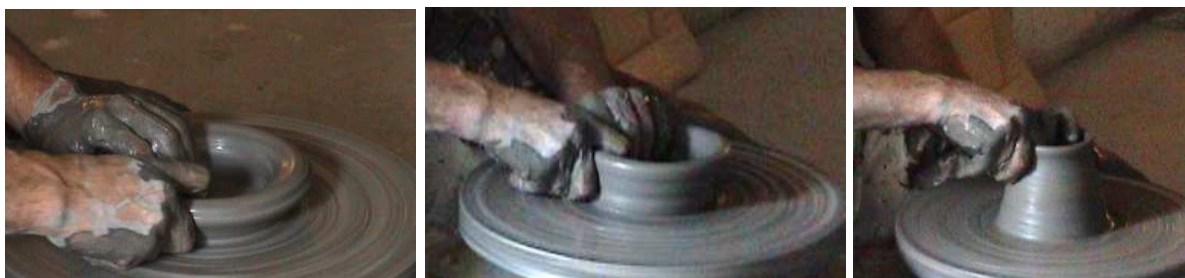*Hand position 47*

| hand position | small sphere | large sphere | French | Multani |
|---------------|--------------|--------------|--------|---------|
| 47            |              | x            | x      |         |

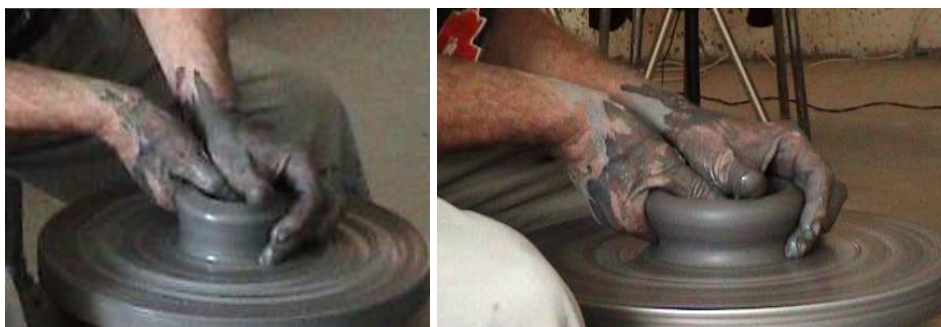*Hand position 48*

| hand position | small sphere | large sphere | French | Multani |
|---------------|--------------|--------------|--------|---------|
| 48            | x            | x            | x      |         |

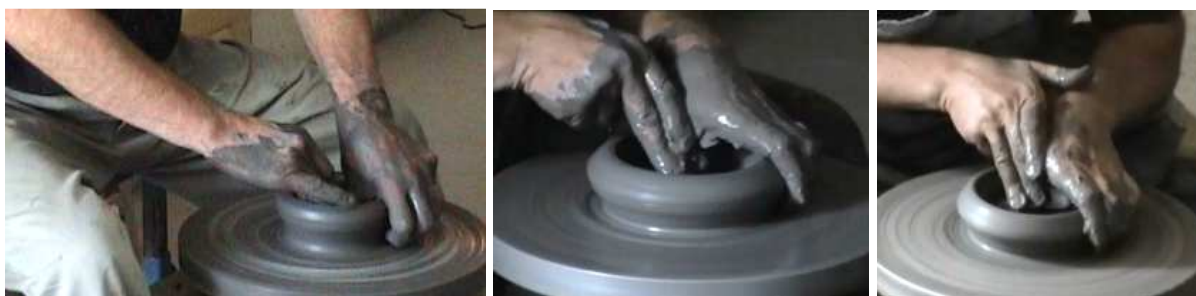

*Hand position 49*

| hand position | small sphere | large sphere | French | Multani |
|---------------|--------------|--------------|--------|---------|
| 49            | x            | x            | x      |         |

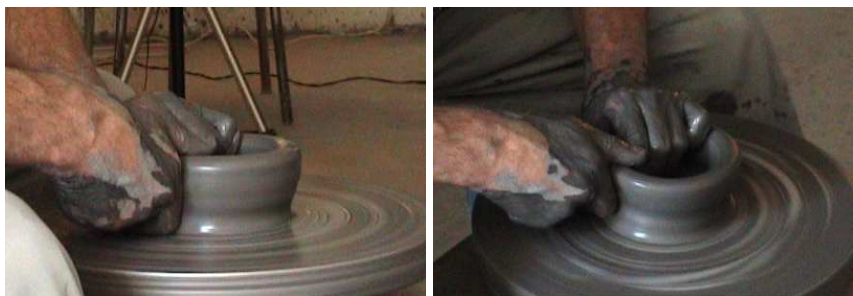*Hand position 50*

| hand position | small sphere | large sphere | French | Multani |
|---------------|--------------|--------------|--------|---------|
| 50            | x            |              | x      |         |

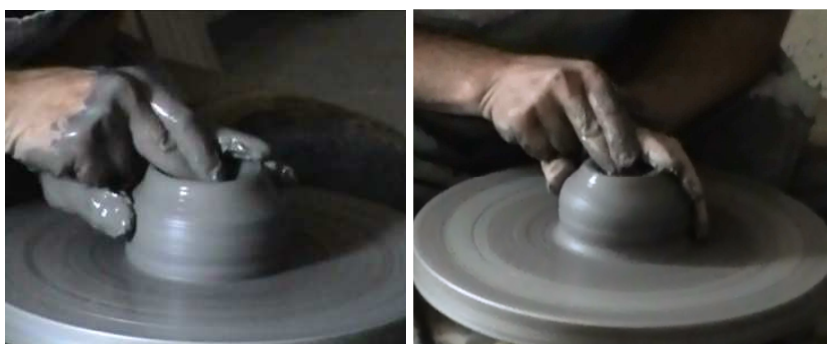*Hand position 51*

| hand position | small sphere | large sphere | French | Multani |
|---------------|--------------|--------------|--------|---------|
| 51            | x            | x            | x      |         |

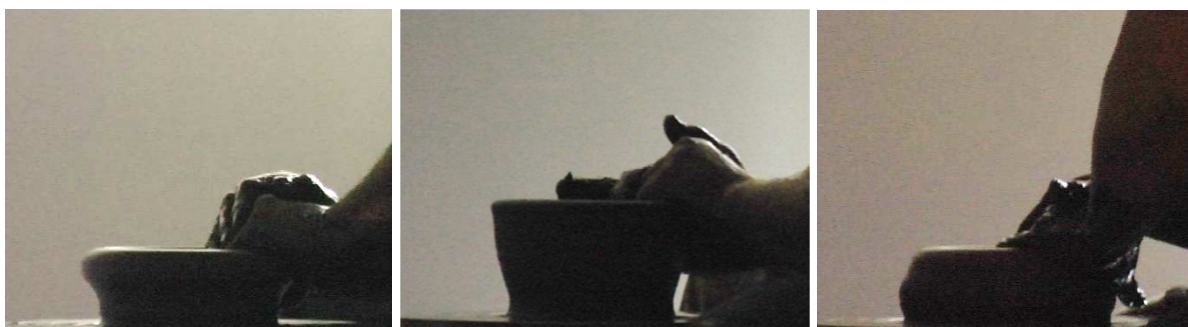

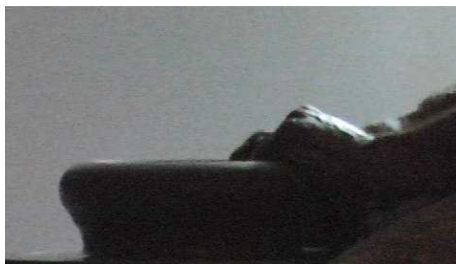

*Hand position 52*

| hand position | small sphere | large sphere | French | Multani |
|---------------|--------------|--------------|--------|---------|
| 52            |              | x            | x      |         |

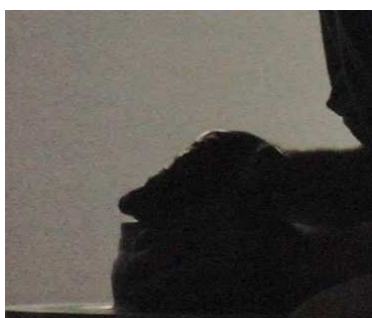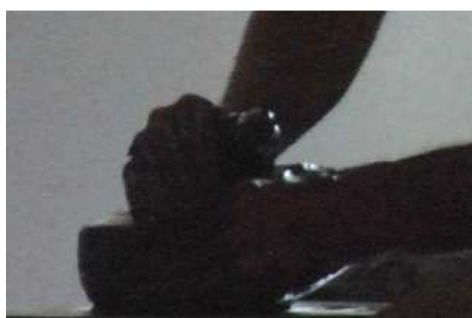

*Hand position 53*

| hand position | small sphere | large sphere | French | Multani |
|---------------|--------------|--------------|--------|---------|
| 53            |              | x            | x      |         |

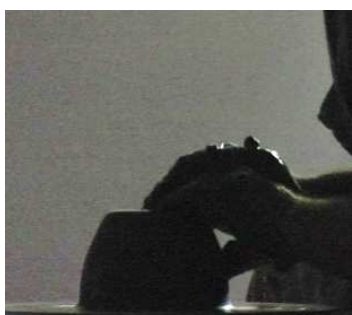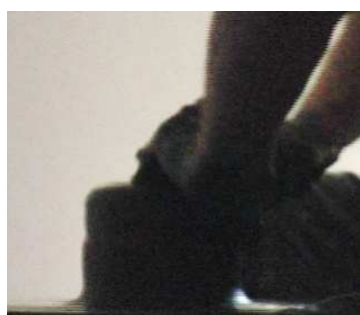

*Hand position 54*

| hand position | small sphere | large sphere | French | Multani |
|---------------|--------------|--------------|--------|---------|
| 54            | x            | x            | x      |         |

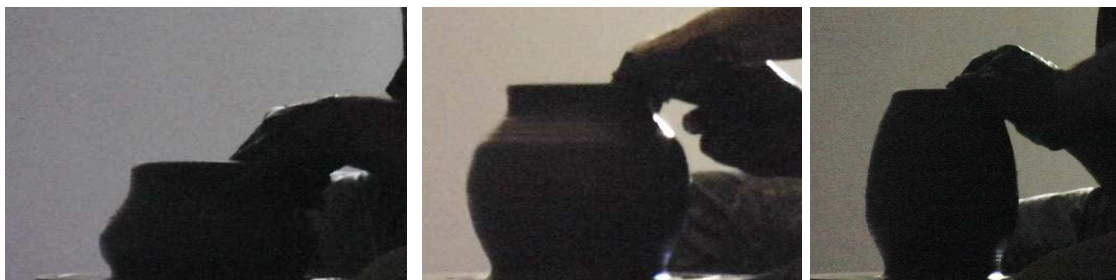*Hand position 55*

| hand position | small sphere | large sphere | French | Multani |
|---------------|--------------|--------------|--------|---------|
| 55            |              | x            | x      |         |

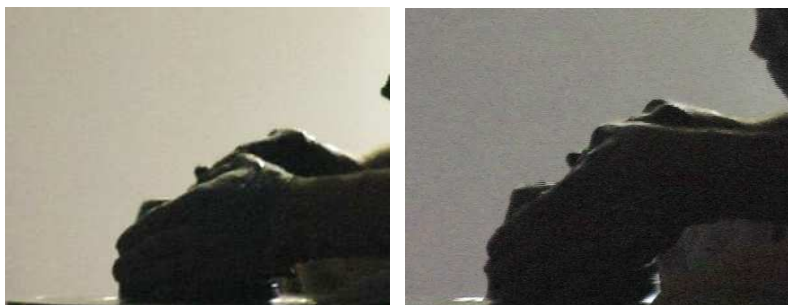*Hand position 56*

| hand position | small sphere | large sphere | French | Multani |
|---------------|--------------|--------------|--------|---------|
| 56            | x            | x            | x      |         |

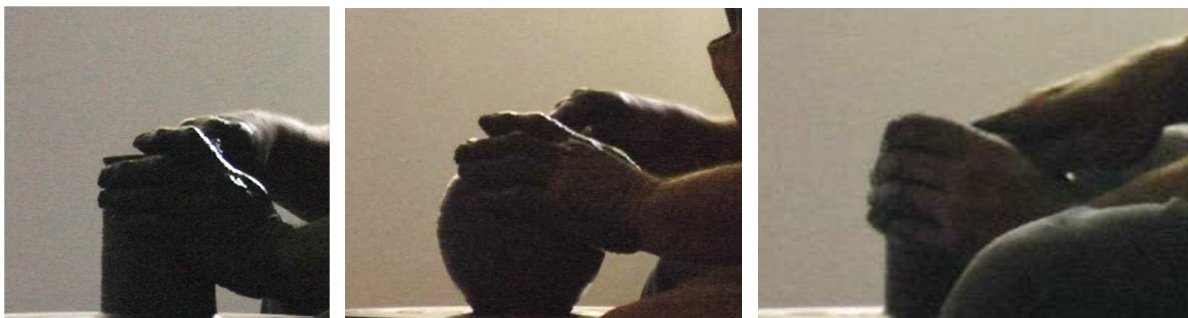

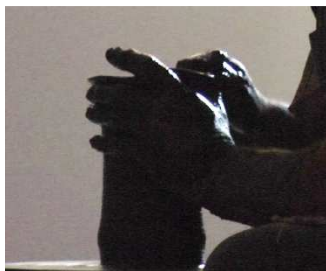

*Hand position 57*

| hand position | small sphere | large sphere | French | Multani |
|---------------|--------------|--------------|--------|---------|
| 57            | x            | x            | x      |         |

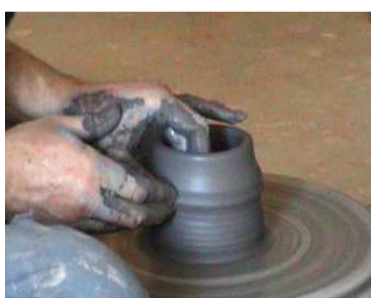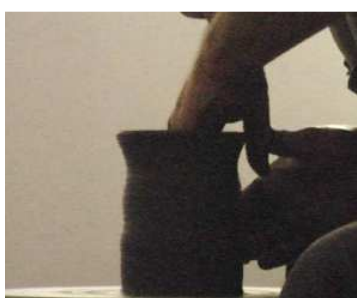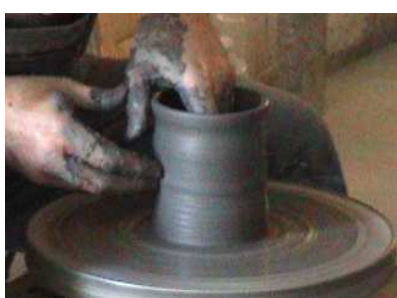

*Hand position 58*

| hand position | small sphere | large sphere | French | Multani |
|---------------|--------------|--------------|--------|---------|
| 58            |              | x            | x      |         |

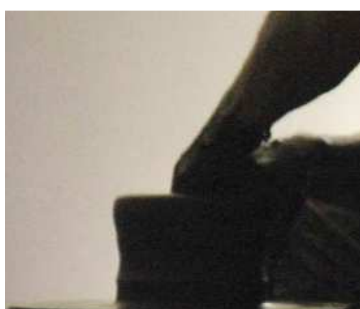



*Hand position 59*

| hand position | small sphere | large sphere | French | Multani |
|---------------|--------------|--------------|--------|---------|
| 59            |              | x            | x      |         |

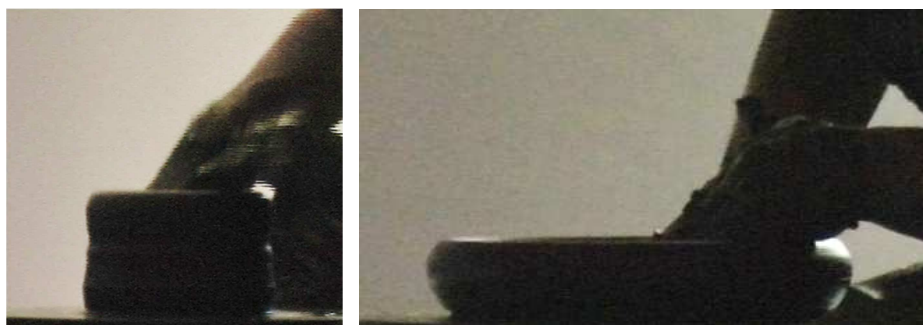*Hand position 60*

| hand position | small sphere | large sphere | French | Multani |
|---------------|--------------|--------------|--------|---------|
| 60            |              | x            | x      |         |

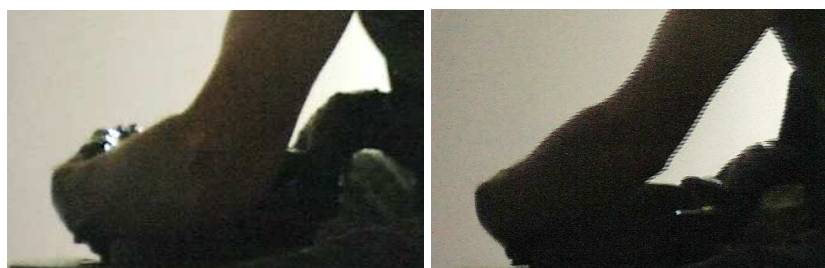*Hand position 61*

| hand position | small sphere | large sphere | French | Multani |
|---------------|--------------|--------------|--------|---------|
| 61            | x            |              | x      |         |

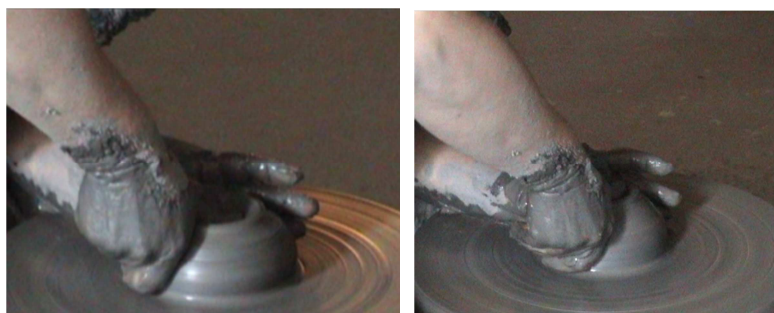

*Hand position 62*

| hand position | small sphere | large sphere | French | Multani |
|---------------|--------------|--------------|--------|---------|
| 62            |              | x            | x      |         |

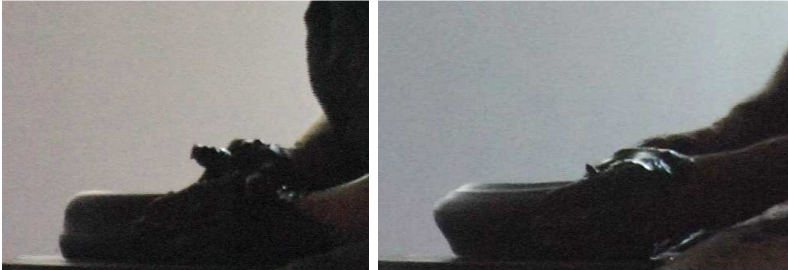

Supplement: pone.0081614.s001.pdf [file pone.0081614.s001.pdf]
