# Supplementary material for: How Can Ten Fingers Shape a Pot? Evidence for Equivalent Function in Culturally Distinct Motor Skills
Source: PubMed Central journal article supplement (PMC3842241; doi:10.1371/journal.pone.0081614), 2013-11-27

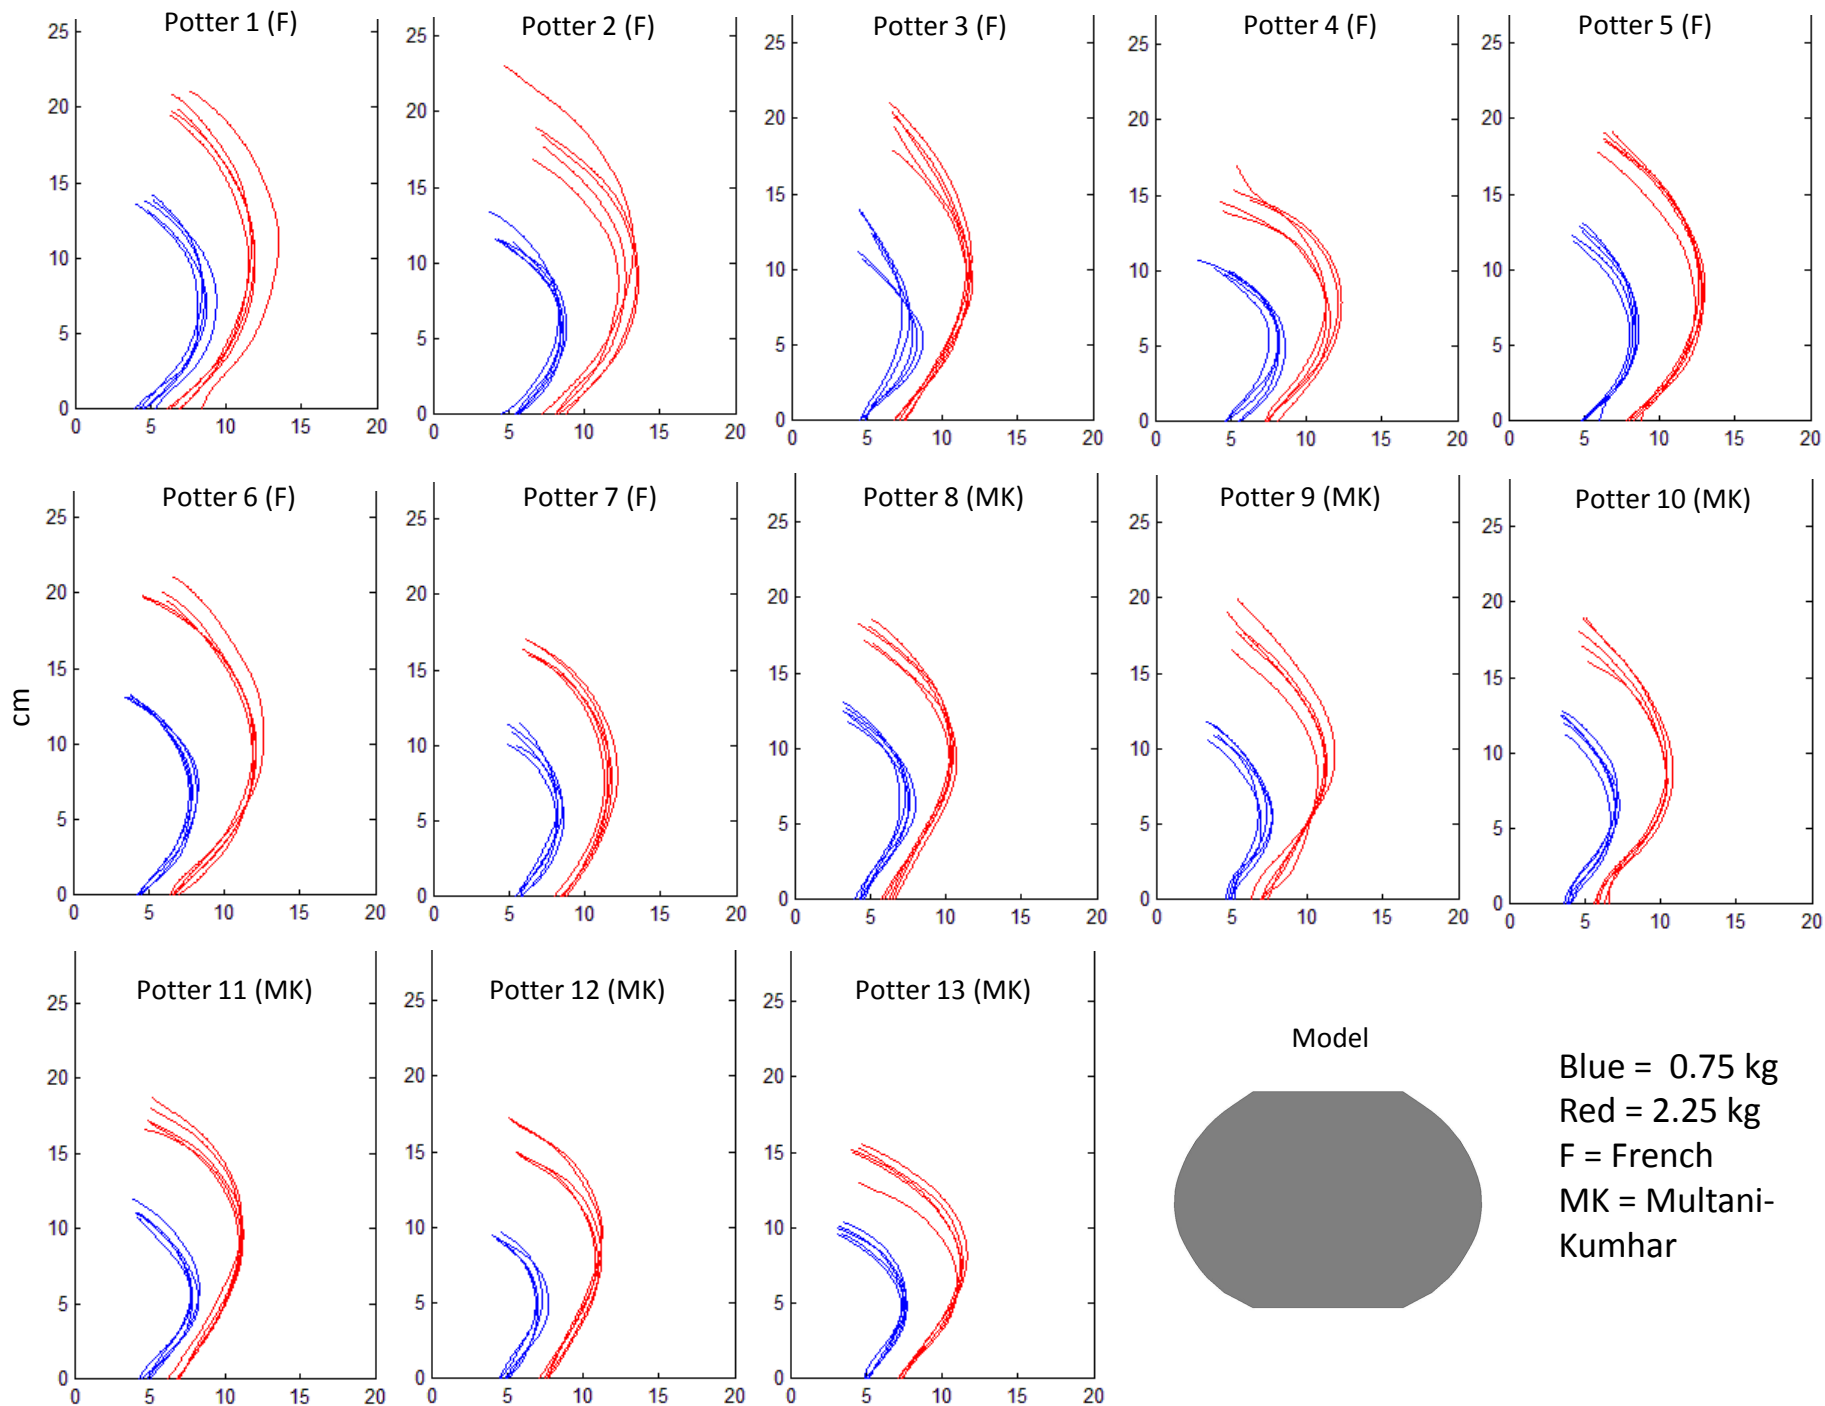

Supplement: pone.0081614.s002.pdf [file pone.0081614.s002.pdf]
